# Supplementary material for: VPS33B and VIPAR are essential for epidermal lamellar body biogenesis and function
Source: PubMed Central journal article supplement (PMC5906731; doi:10.1016/j.bbadis.2018.01.028), 2018-05
Supplement: mmc1.pdf [file mmc1.pdf]

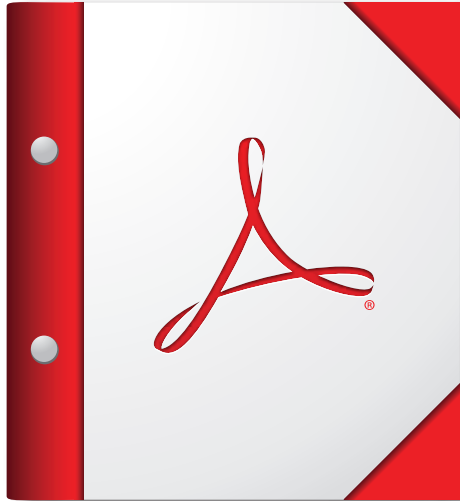

**For the best experience, open this PDF portfolio in  
Acrobat 9 or Adobe Reader 9, or later.**

[Get Adobe Reader Now!](#)
