# Supplementary material for: VPS33B and VIPAR are essential for epidermal lamellar body biogenesis and function
Source: PubMed Central journal article supplement (PMC5906731; doi:10.1016/j.bbadis.2018.01.028), 2018-05
Supplement: mmc2.pdf [file mmc2.pdf]

## **VPS33B and VIPAR are essential for epidermal lamellar body biogenesis and function**

**Clare Rogerson**<sup>a, b, +</sup> and **Paul Gissen**<sup>a, b, c</sup>

<sup>a</sup> MRC Laboratory for Molecular Cell Biology, University College London, London WC1E 6BT, UK

<sup>b</sup> Institute of Child Health, University College London, London WC1N 1EH, UK

<sup>c</sup> Inherited Metabolic Diseases Unit, Great Ormond Street Hospital, London WC1N 3JH, UK

+ *Present address: Centre for Cell Biology and Cutaneous Research, Blizard Institute, Barts and The London School of Medicine and Dentistry, Queen Mary University of London, London E1 2AT*

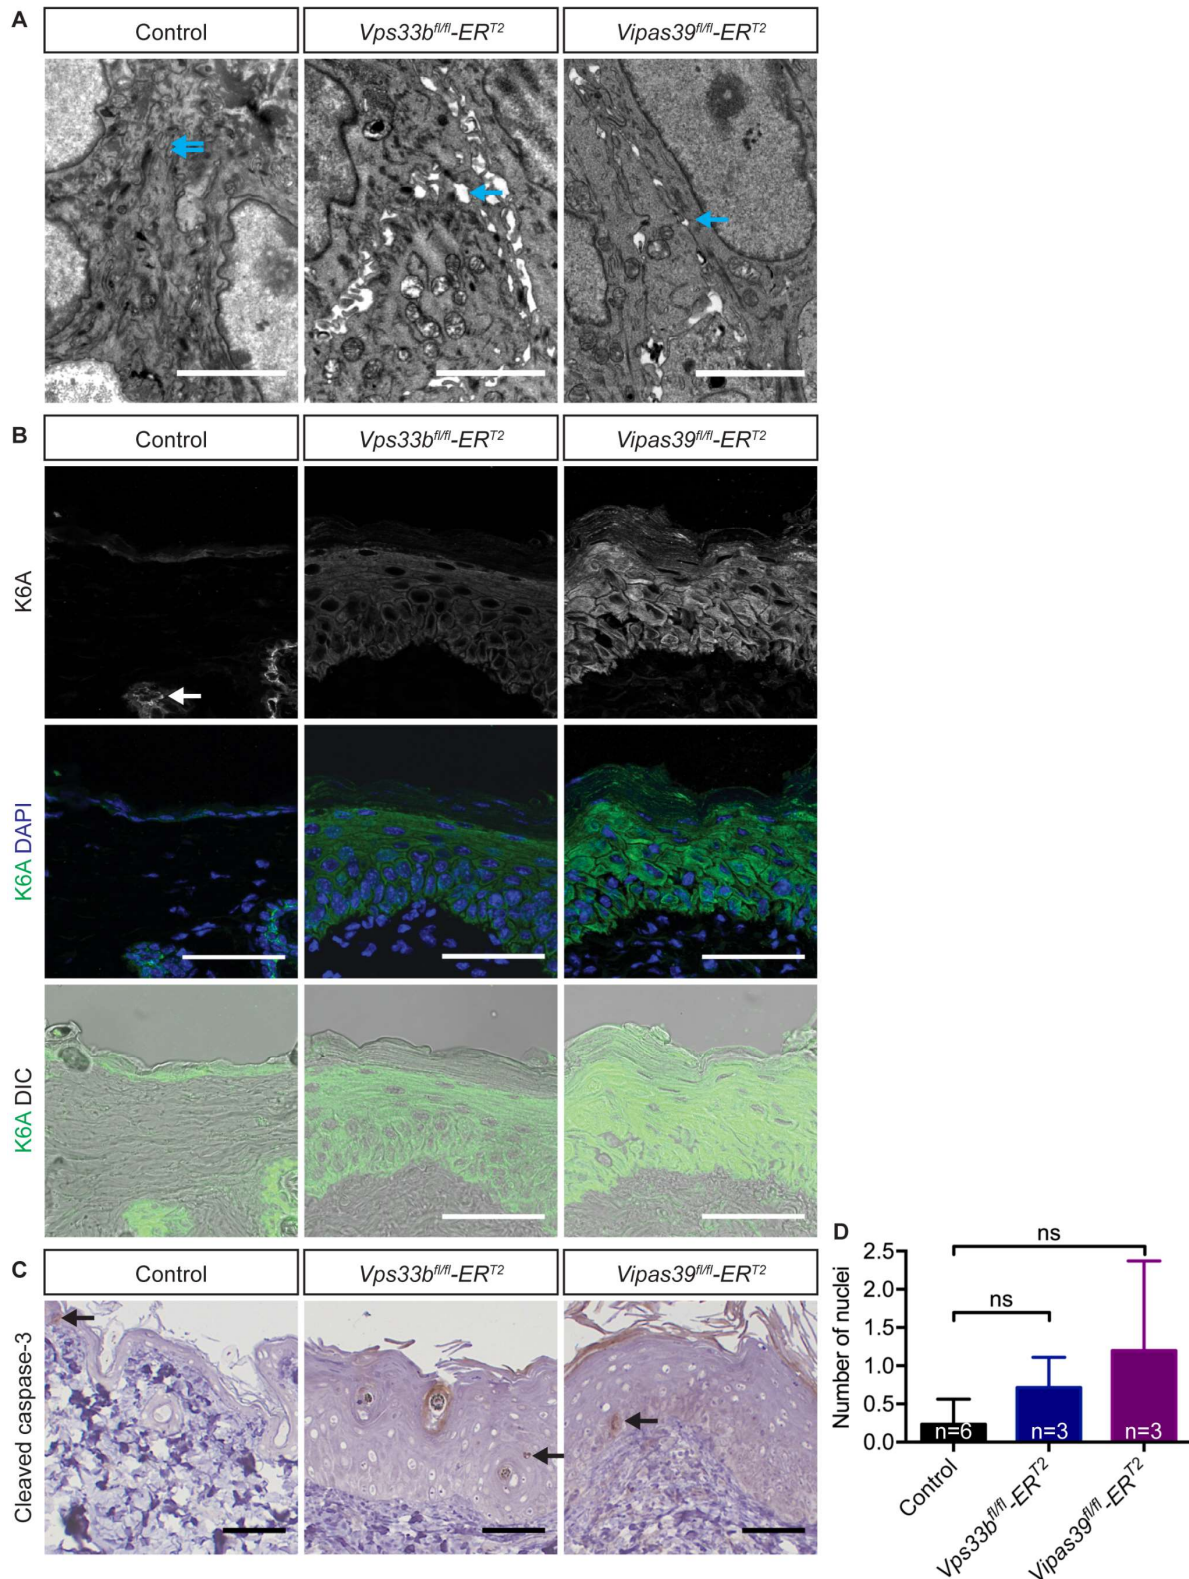

Supplementary Figure 1– *Vps33b* and *Vipar* deficient murine epidermis shows spongiosis, increased expression of hyperproliferative keratin K6A and no change in the expression of cleaved caspase-3 apoptotic marker. A - TEM images of control, *Vps33b<sup>fl/fl</sup>ERT<sup>2</sup>* and *Vipar39<sup>fl/fl</sup>ERT<sup>2</sup>* murine biopsies. Normal cell-cell contact (double arrow), wider gaps (single arrow). Scale bars = 5  $\mu$ m. Images are representative of two independent mouse biopsies. B - K6A staining of control, *Vps33b<sup>fl/fl</sup>ERT<sup>2</sup>* and *Vipar39<sup>fl/fl</sup>ERT<sup>2</sup>* skin sections, counterstained with DAPI. Hair follicles (white arrow). Scale bars = 50  $\mu$ m. Images are a maximum projection of a z-stack. DIC images are a single z-slice image. Images are representative of results from at least six control and three *Vps33b<sup>fl/fl</sup>ERT<sup>2</sup>* and *Vipar39<sup>fl/fl</sup>ERT<sup>2</sup>* independent murine biopsies. C – Immunohistochemical staining for cleaved caspase-3 in control, *Vps33b<sup>fl/fl</sup>ERT<sup>2</sup>* and *Vipar39<sup>fl/fl</sup>ERT<sup>2</sup>* epidermis. Cleaved caspase-3 positive cells (black arrow). Scale bars = 100  $\mu$ m. Images are representative of results from at least six control and three *Vps33b<sup>fl/fl</sup>ERT<sup>2</sup>* and *Vipar39<sup>fl/fl</sup>ERT<sup>2</sup>* independent murine biopsies. D - Number of cleaved caspase-3 stained nuclei per mm of epidermis. Three fields of view analysed per mouse, number of mice analysed are indicated. Data are mean  $\pm$  standard deviation, ordinary one-way ANOVA, non-significant (ns)  $p > 0.05$ .

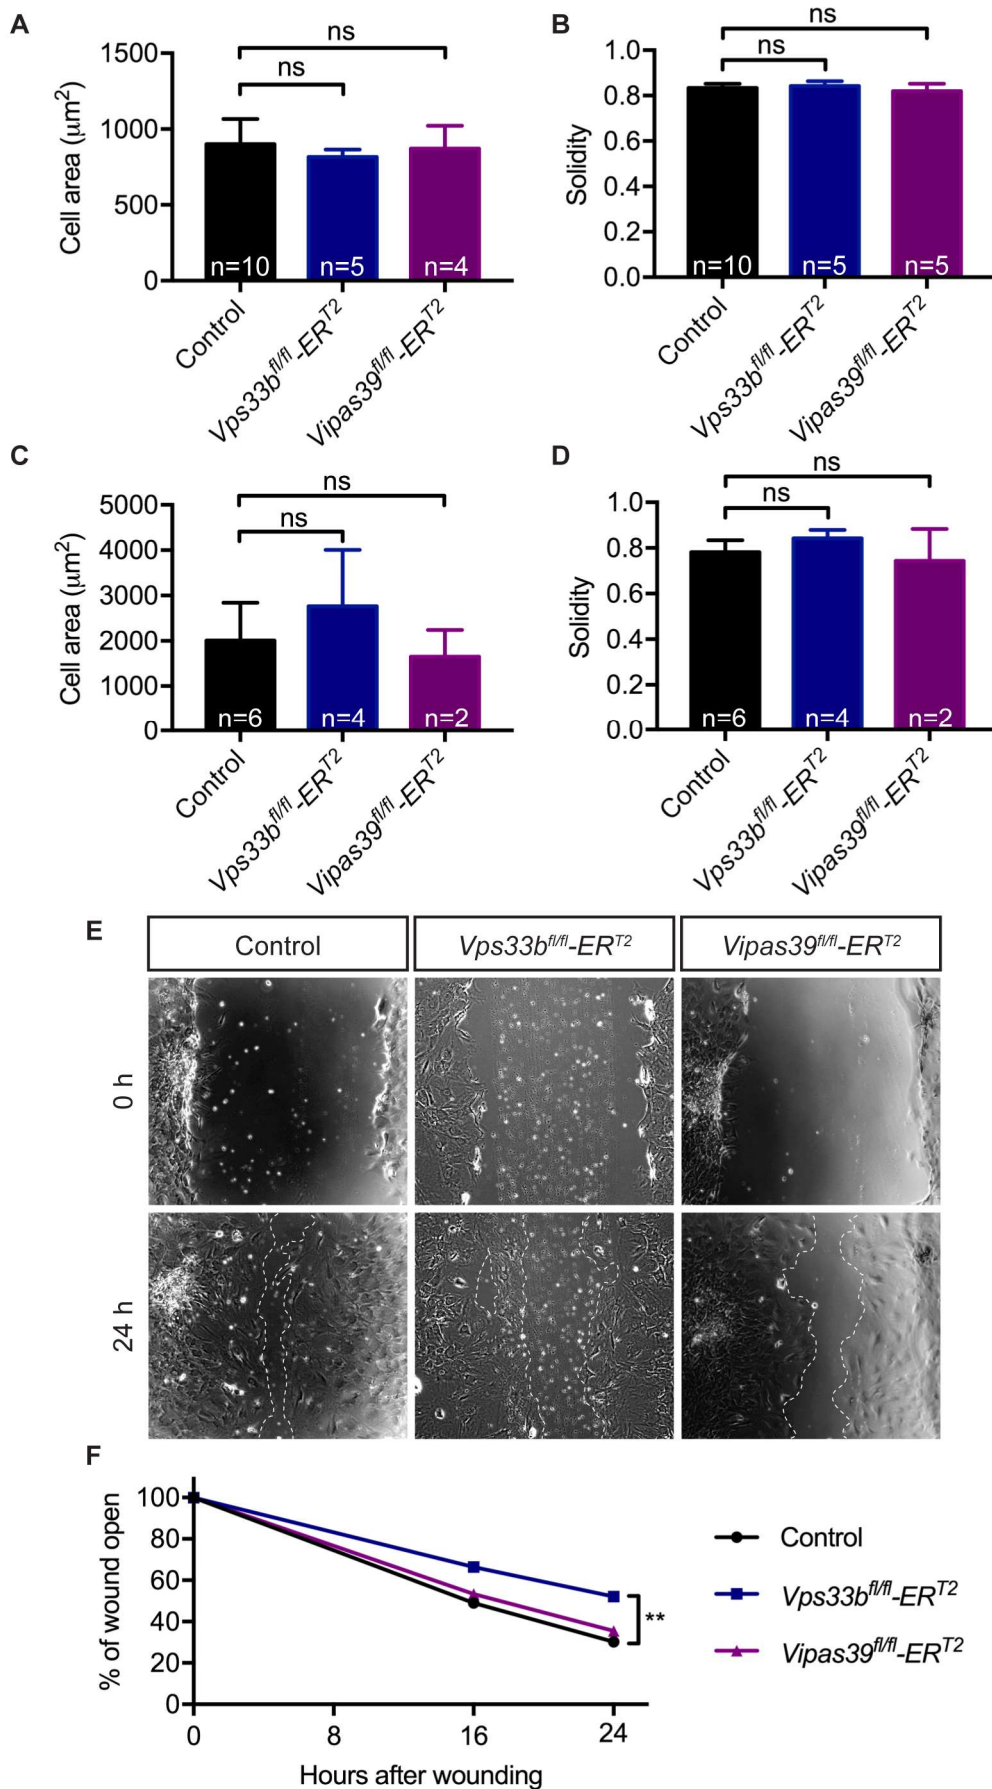

Supplementary Figure 2 - Cell spreading and wound healing are not substantially affected in *Vps33b* and *Vipar* deficient mice. A - Keratinocyte area after 1 h on fibronectin. B - Keratinocyte solidity after 1 h on fibronectin. C - Fibroblast area after 1 h. D - Fibroblast solidity after 1 h. For cell spreading at least three fields of view were measured per isolation, number of isolations analysed (n) are indicated in three independent keratinocyte and two independent fibroblast experiments. E - Representative images of wound healing experiments of control, *Vps33b<sup>fl/fl</sup>-ER<sup>T2</sup>* and *Vipas39<sup>fl/fl</sup>-ER<sup>T2</sup>* fibroblasts. F - Percentage wound closure in control, *Vps33b<sup>fl/fl</sup>-ER<sup>T2</sup>* and *Vipas39<sup>fl/fl</sup>-ER<sup>T2</sup>* wound healing assays. Results are representative of experiments from at least three independent fibroblast isolations. Data are mean  $\pm$  standard deviation, ordinary one-way ANOVA, \*  $p \leq 0.05$ , \*\*  $p \leq 0.01$ , all other comparisons were non-significant (ns)  $p > 0.05$ .
